# Supplementary material for: Preparation and properties of a novel poly(lactic-acid)-based thermoplastic vulcanizate from both experiments and simulations
Source: Royal Society of Chemistry journal article supplement (doi:10.1039/d2ra00286h), 2022-01-01
Supplement: d2ra00286h1.pdf [file d2ra00286h1.pdf]

## Supporting Information

### Preparation and Properties of A Novel Poly(lactic-acid)-based Thermoplastic Vulcanizate from Both Experiments and Simulations

Xue Li,<sup>\* a</sup> Hailan Kang,<sup>b</sup> Qiulan Luo,<sup>a</sup> and Jianxiang Shen<sup>\* c</sup>

<sup>a</sup> Institute of Novel Materials, Jiaying Nanhu University, Jiaying 314001, P.R. China

<sup>b</sup> College of Materials Science and Engineering, Shenyang University of Chemical Technology, Shenyang110142, China

<sup>c</sup> Department of Polymer Science and Technology, Jiaying University, Jiaying 314001, China

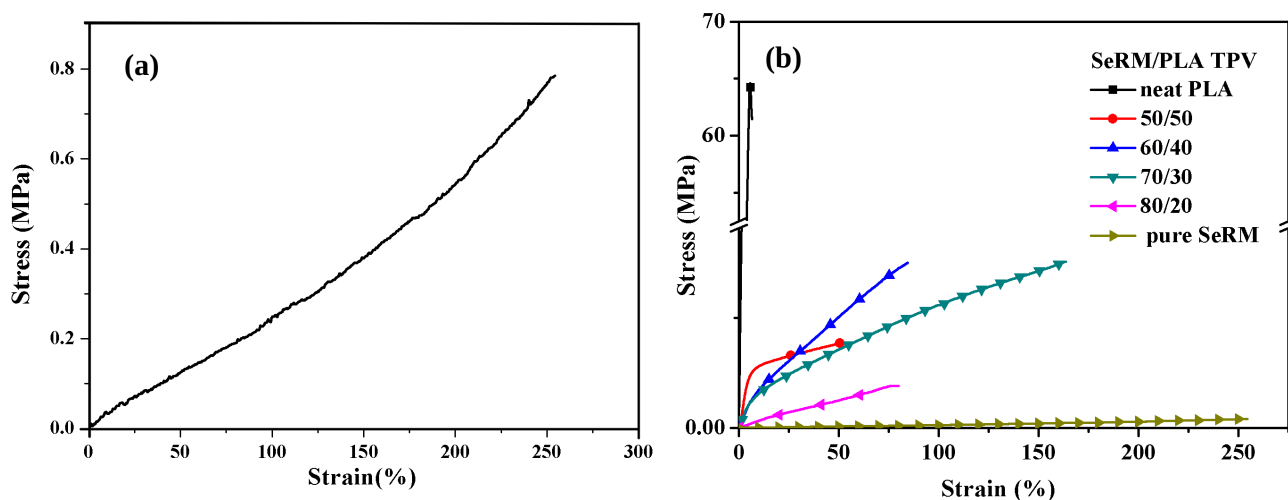

Fig. S1. Stress-strain curve of (a) pure SeRM and (b) bio-based TPVs with different blending ratios of SeRM/PLA

**Table S1. Comparing mechanical properties of SeRM/PLA TPV with other PLA-based TPVs**

| TPV Composition <sup>a</sup> | R/P (w/w) <sup>β</sup> | $\sigma_T$ (MPa) <sup>γ</sup> | $\epsilon_b$ (%) <sup>δ</sup> | Preparation Method              | Ref. |
|------------------------------|------------------------|-------------------------------|-------------------------------|---------------------------------|------|
| SeRM/PLA                     | 70/30                  | ~14.7                         | ~164                          | Dynamical Vulcanization         | --   |
| NR/PLA                       | 40/60                  | ~20                           | ~100                          | Dynamical Vulcanization         | [1]  |
| NR/PLA                       | 50/50                  | 10.9                          | 240                           | Dynamical Vulcanization         | [2]  |
| ENR/PLA                      | 70/30                  | 10.9                          | 240                           | Latex Mixing, Melt Mixing       | [3]  |
| BPE/PLA                      | 60/40                  | 17.8                          | 184                           | in-situ Dynamical Crosslinking  | [4]  |
| PLBSI/PLA                    | 60/40                  | 19.6                          | 314                           | in-situ Dynamical Vulcanization | [5]  |
| EVA/PLA                      | 60/40                  | 20                            | 300                           | in-situ Dynamical Vulcanization | [6]  |
| EMMA-Zn/EBA-GMA/PLA          | 10/10/80               | 36.2                          | 229.1                         | Dynamical Vulcanization         | [7]  |
| ACM/EMAA/PLA                 | 60/6/40                | ~3.5                          | ~218                          | Reactive Blending               | [8]  |
| EUG-g-GMA/PLA                | 40/60                  | ~35                           | 285                           | Dynamical Vulcanization         | [9]  |

<sup>a</sup> polymer abbreviations:

NR: nature rubber; ENR: epoxidized natural rubber; BPE: bio-based polyester;  
 EVA: ethylene-co-vinyl acetate; PLBSI: poly (butanediol/lactate/sebacate/itaconate);  
 EBA-GMA: ethylene/n-butyl acrylate/glycidyl methacrylate;  
 EMMA-Zn: zinc ionomer of ethylene-methacrylic acid copolymer;  
 ACM: acrylic rubber; EUG-GMA: eucommia ulmoides gum/glycidyl methacrylate

<sup>β</sup> weight ratio of rubber to thermoplastic

<sup>γ</sup> tensile strength

<sup>δ</sup> elongation at break

## Reference

- [1] Si W J, Yuan W Q, Li Y D, et al. Tailoring toughness of fully biobased poly(lactic acid)/natural rubber blends through dynamic vulcanization. *Polymer Testing*, 2018, 65: 249-255.
- [2] Yuan D S, Ding J P, Mou W J, et al. Bio-based polylactide/epoxidized natural rubber thermoplastic vulcanizates with a co-continuous phase structure. *Polymer Testing*, 2017, 64: 200-206.
- [3] Cao L M, Liu C, Zou D J, et al. Using cellulose nanocrystals as sustainable additive to enhance mechanical and shape memory properties of PLA/ENR thermoplastic vulcanizates. *Carbohydrate Polymers*, 2020, 230: 115618.
- [4] Kang H L, Hu X R, Li M Q, et al. Novel biobased thermoplastic elastomer consisting of synthetic polyester elastomer and polylactide by in situ dynamical crosslinking method. *RSC Advances*, 2015, 5(30): 23498-23507.
- [5] Hu X R, Kang H L, Li Y, et al. Preparation, morphology and superior performances of biobased thermoplastic elastomer by in situ dynamical vulcanization for 3D-printed materials. *Polymer*, 2017, 108: 11-20.
- [6] Ma P M, Xu P W, Liu W C, et al. Bio-based poly(lactide)/ethylene-co-vinyl acetate thermoplastic vulcanizates by dynamic crosslinking: structure vs. property. *RSC Advances*, 2015, 5(21): 15962-15968.

- [7] Liu H Z, Chen F, Liu B, et al. Super Toughened Poly(lactic acid) Ternary Blends by Simultaneous Dynamic Vulcanization and Interfacial Compatibilization. *Macromolecules*, 2010, 43(14): 6058-6066.
- [8] Jantanasakulwong K, Kobayashi Y, Kuboyama K, et al. Thermoplastic vulcanizate based on poly (lactic acid) and acrylic rubber blended with ethylene ionomer. *Journal of Macromolecular Science, Part B.*, 2016, 55(11):1068-1085.
- [9] Wang Y, Liu J H, Xia L, et al. Fully Biobased Shape Memory Thermoplastic Vulcanizates from Poly(Lactic Acid) and Modified Natural *Eucommia Ulmoides* Gum with Co-Continuous Structure and Super Toughness. *Polymers*, 2019, 11(12), 2040.
